# Supplementary material for: Internet of things (IoT)-based structural health monitoring of laboratory-scale civil engineering structures
Source: Springer Nature journal article supplement (doi:10.1007/s41062-024-01413-9), 2024-03-22
Supplement: MOESM1 [file 26916446]

Datasheet of IoT-based devices for cost-analysis

| IoT based device                 | Cost (USD) |
|----------------------------------|------------|
| <b>SENSOR</b>                    |            |
| MPU6050                          | 3.6        |
| ADXL345                          | 4.8        |
| ADXL335                          | 15.6       |
| AX-3DS                           | 300        |
| Piezoelectric Type Accelerometer | 400        |
| Accelerometer Model X2-2         | 475        |
| <b>MICROCONTROLLER</b>           |            |
| Raspberry Pi 4 Model             | 230        |
| Arduino UNO R3                   | 60         |
| LAFVIN NANO V3                   | 30         |
| ESP32                            | 25         |
| NODE MCU ESP8266                 | 24         |
| MEGA2560_BOARD                   | 20         |
| ATTINY85 USB                     | 6          |
| REES52 W1209 12V                 | 6          |
